# Supplementary figures and images for: 6′-O-Caffeoylarbutin from Que Zui tea ameliorates acetaminophen-induced liver injuryviaenhancing antioxidant ability and regulating the PI3K signaling pathway
Source: Royal Society of Chemistry journal article supplement (doi:10.1039/d2fo00507g), 2022-01-01

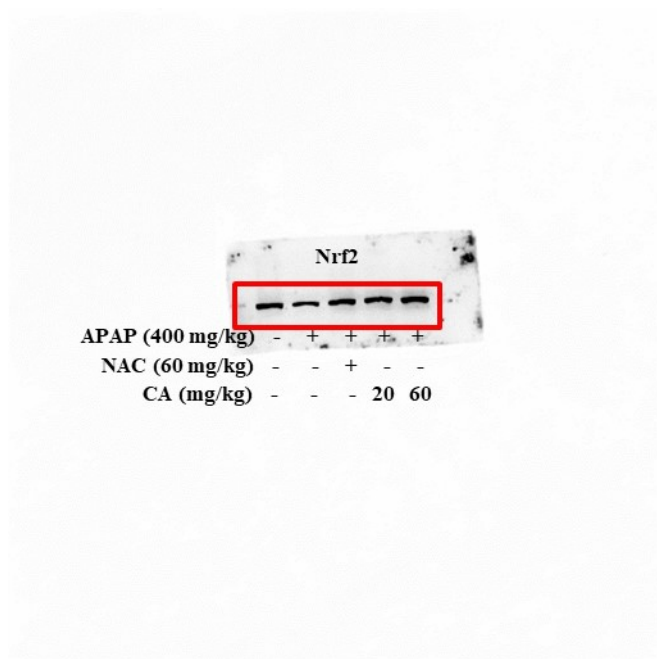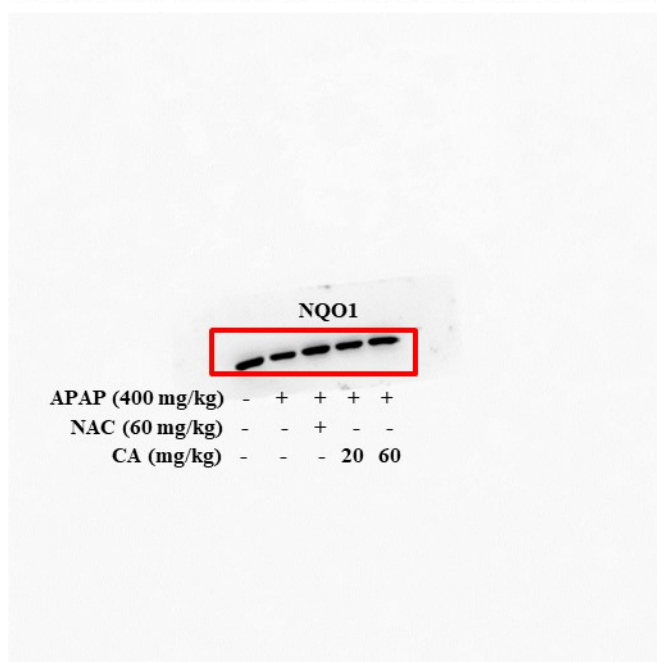

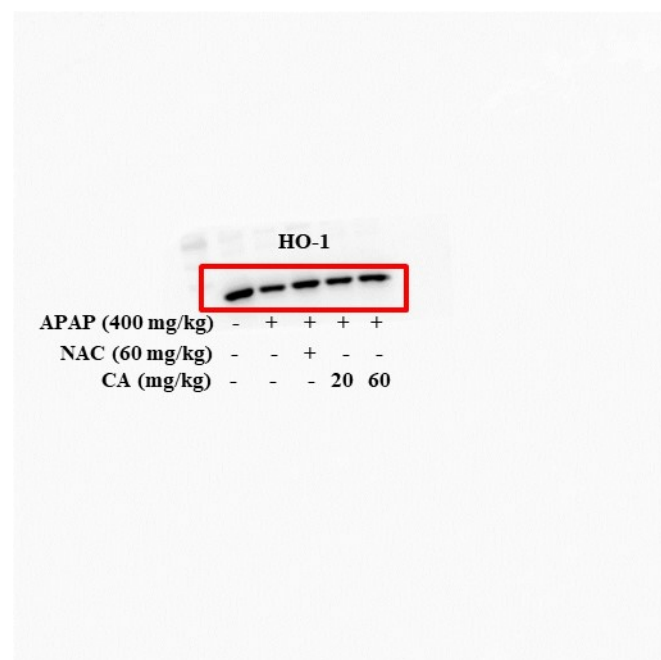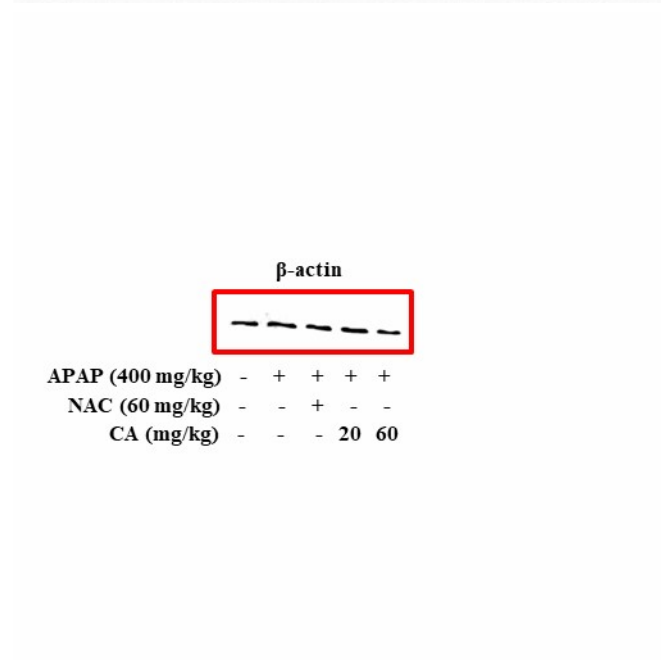

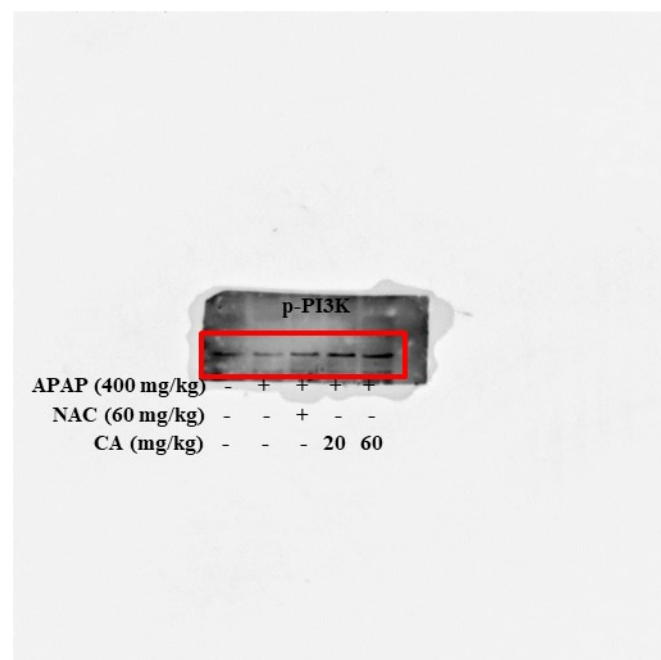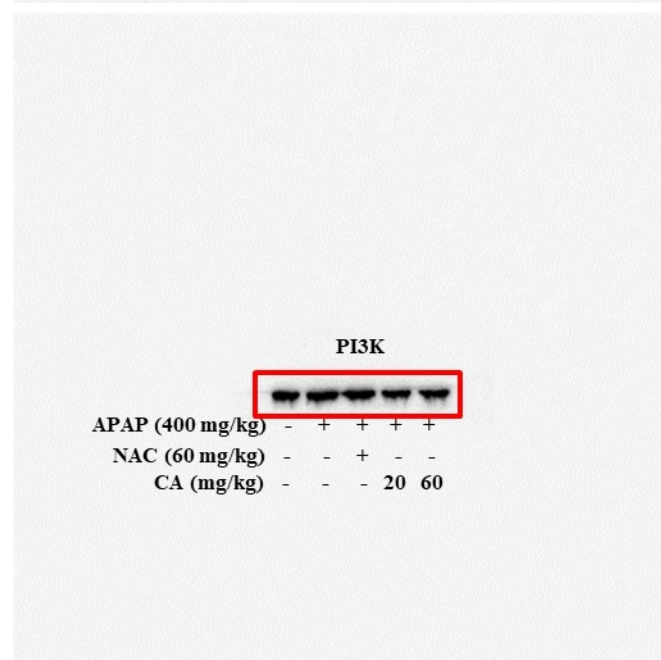

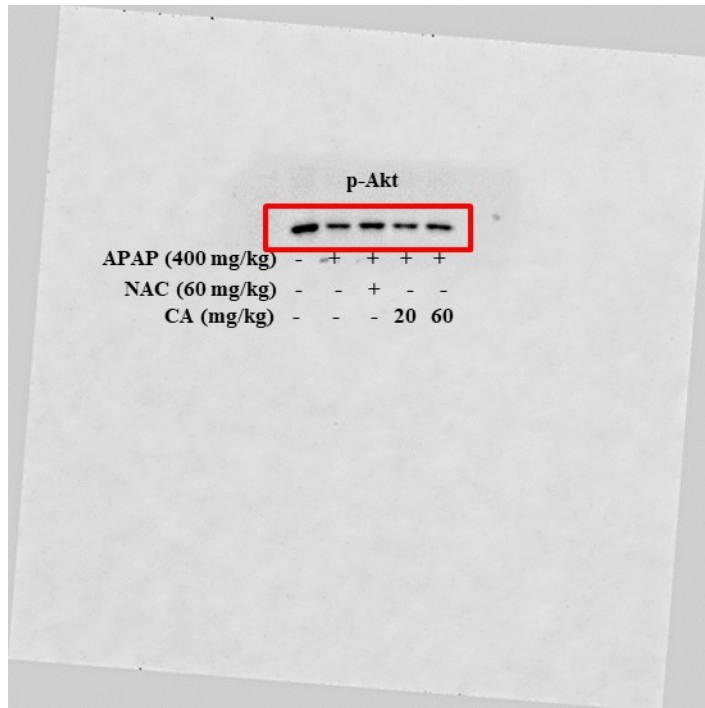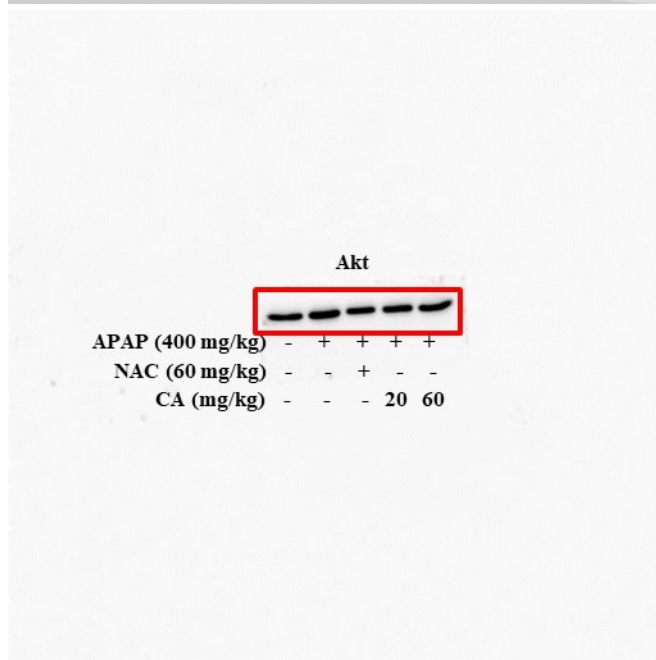

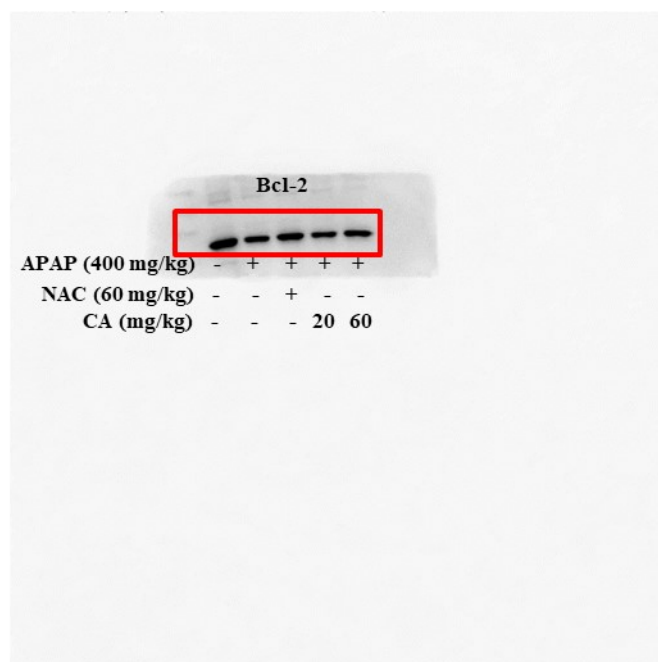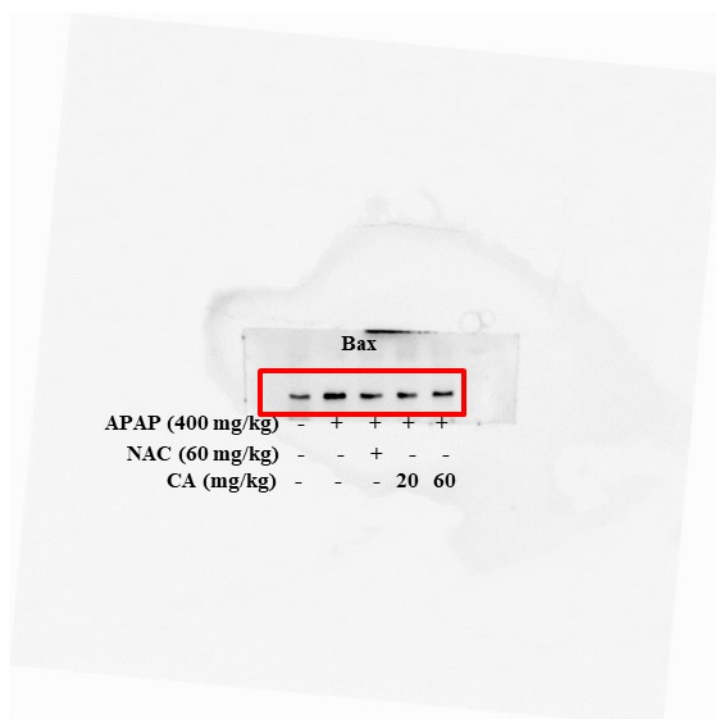

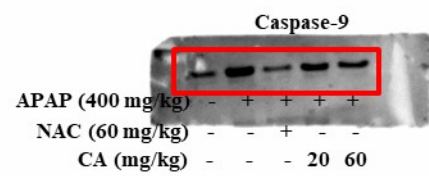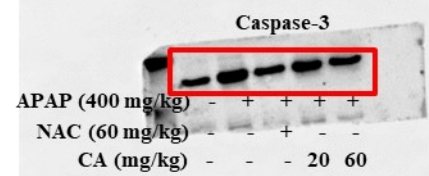

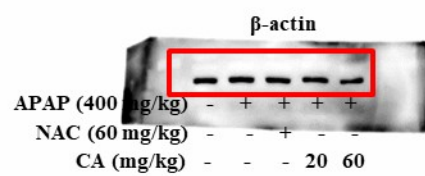

Supplement: d2fo00507g1.pdf [file d2fo00507g1.pdf]
